# Supplementary material
Source: publisher figshare collection journal article supplement (https://acs.figshare.com/ndownloader/files/7337099)
Supplement: Supplementary file 1 [file 7337099]

 
data_1 
 
_audit_creation_method            SHELXL-97 
_chemical_name_systematic 
; 
 ? 
; 
_chemical_name_common             ? 
_chemical_melting_point           ? 
_chemical_formula_moiety          ? 
_chemical_formula_sum 
 'C14 H22 N2 O2' 
_chemical_formula_weight          250.34 
 
loop_ 
 _atom_type_symbol 
 _atom_type_description 
 _atom_type_scat_dispersion_real 
 _atom_type_scat_dispersion_imag 
 _atom_type_scat_source 
 'C'  'C'   0.0033   0.0016 
 'International Tables Vol C Tables 4.2.6.8 and 6.1.1.4' 
 'H'  'H'   0.0000   0.0000 
 'International Tables Vol C Tables 4.2.6.8 and 6.1.1.4' 
 'N'  'N'   0.0061   0.0033 
 'International Tables Vol C Tables 4.2.6.8 and 6.1.1.4' 
 'O'  'O'   0.0106   0.0060 
 'International Tables Vol C Tables 4.2.6.8 and 6.1.1.4' 
 
_symmetry_cell_setting            triclinic 
_symmetry_space_group_name_H-M    p-1 
 
loop_ 
 _symmetry_equiv_pos_as_xyz 
 'x, y, z' 
 '-x, -y, -z' 
 
_cell_length_a                    6.1414(12) 
_cell_length_b                    10.463(2) 
_cell_length_c                    12.483(3) 
_cell_angle_alpha                 110.06(3) 
_cell_angle_beta                  102.97(3) 
_cell_angle_gamma                 92.87(3) 
_cell_volume                      727.2(3) 
_cell_formula_units_Z             2 
_cell_measurement_temperature     293(2) 
_cell_measurement_reflns_used     ? 
_cell_measurement_theta_min       ? 
_cell_measurement_theta_max       ? 
 
_exptl_crystal_description        ? 
_exptl_crystal_colour             ? 
_exptl_crystal_size_max           ? 
_exptl_crystal_size_mid           ? 
_exptl_crystal_size_min           ? 
_exptl_crystal_density_meas       ? 
_exptl_crystal_density_diffrn     1.143 
_exptl_crystal_density_method     'not measured' 
_exptl_crystal_F_000              272 
_exptl_absorpt_coefficient_mu     0.077 
_exptl_absorpt_correction_type    ? 
_exptl_absorpt_correction_T_min   ? 
_exptl_absorpt_correction_T_max   ? 
_exptl_absorpt_process_details    ? 
 
_exptl_special_details 
; 
 ? 
; 
 
_diffrn_ambient_temperature       293(2) 
_diffrn_radiation_wavelength      0.71073 
_diffrn_radiation_type            MoK\a 
_diffrn_radiation_source          'fine-focus sealed tube' 
_diffrn_radiation_monochromator   graphite 
_diffrn_measurement_device_type   ? 
_diffrn_measurement_method        ? 
_diffrn_detector_area_resol_mean  ? 
_diffrn_standards_number          ? 
_diffrn_standards_interval_count  ? 
_diffrn_standards_interval_time   ? 
_diffrn_standards_decay_%         ? 
_diffrn_reflns_number             7047 
_diffrn_reflns_av_R_equivalents   0.0380 
_diffrn_reflns_av_sigmaI/netI     0.0548 
_diffrn_reflns_limit_h_min        -7 
_diffrn_reflns_limit_h_max        7 
_diffrn_reflns_limit_k_min        -13 
_diffrn_reflns_limit_k_max        13 
_diffrn_reflns_limit_l_min        -16 
_diffrn_reflns_limit_l_max        16 
_diffrn_reflns_theta_min          3.22 
_diffrn_reflns_theta_max          27.48 
_reflns_number_total              3292 
_reflns_number_gt                 1471 
_reflns_threshold_expression      >2sigma(I) 
 
_computing_data_collection        ? 
_computing_cell_refinement        ? 
_computing_data_reduction         ? 
_computing_structure_solution     'SHELXS-97 (Sheldrick, 1990)' 
_computing_structure_refinement   'SHELXL-97 (Sheldrick, 1997)' 
_computing_molecular_graphics     ? 
_computing_publication_material   ? 
 
_refine_special_details 
; 
 Refinement of F^2^ against ALL reflections.  The weighted R-factor wR and 
 goodness of fit S are based on F^2^, conventional R-factors R are based 
 on F, with F set to zero for negative F^2^. The threshold expression of 
 F^2^ > 2sigma(F^2^) is used only for calculating R-factors(gt) etc. and is 
 not relevant to the choice of reflections for refinement.  R-factors based 
 on F^2^ are statistically about twice as large as those based on F, and R- 
 factors based on ALL data will be even larger. 
; 
 
_refine_ls_structure_factor_coef  Fsqd  
_refine_ls_matrix_type            full 
_refine_ls_weighting_scheme       calc  
_refine_ls_weighting_details 
 'calc w=1/[\s^2^(Fo^2^)+(0.1633P)^2^+0.0074P] where P=(Fo^2^+2Fc^2^)/3' 
_atom_sites_solution_primary      direct 
_atom_sites_solution_secondary    difmap 
_atom_sites_solution_hydrogens    geom 
_refine_ls_hydrogen_treatment     mixed 
_refine_ls_extinction_method      none 
_refine_ls_extinction_coef        ? 
_refine_ls_number_reflns          3292 
_refine_ls_number_parameters      168 
_refine_ls_number_restraints      0 
_refine_ls_R_factor_all           0.1625 
_refine_ls_R_factor_gt            0.0822 
_refine_ls_wR_factor_ref          0.3025 
_refine_ls_wR_factor_gt           0.2384 
_refine_ls_goodness_of_fit_ref    1.041 
_refine_ls_restrained_S_all       1.041 
_refine_ls_shift/su_max           0.000 
_refine_ls_shift/su_mean          0.000 
 
loop_ 
 _atom_site_label 
 _atom_site_type_symbol 
 _atom_site_fract_x 
 _atom_site_fract_y 
 _atom_site_fract_z 
 _atom_site_U_iso_or_equiv 
 _atom_site_adp_type 
 _atom_site_occupancy 
 _atom_site_symmetry_multiplicity 
 _atom_site_calc_flag 
 _atom_site_refinement_flags 
 _atom_site_disorder_assembly 
 _atom_site_disorder_group 
N1 N 0.3166(4) 0.6772(3) 0.5841(2) 0.0742(8) Uani 1 1 d . . . 
C10 C -0.0067(5) 0.6962(3) 0.4372(3) 0.0752(9) Uani 1 1 d . . . 
N2 N -0.0488(4) 0.7820(3) 0.3775(2) 0.0820(9) Uani 1 1 d . . . 
C7 C 0.2295(5) 0.7431(3) 0.5146(3) 0.0642(8) Uani 1 1 d . . . 
O2 O -0.1360(4) 0.6010(2) 0.4308(2) 0.1042(10) Uani 1 1 d . . . 
C4 C 0.5410(5) 0.7226(3) 0.6649(3) 0.0786(10) Uani 1 1 d . . . 
H4 H 0.6384 0.7588 0.6266 0.094 Uiso 1 1 calc R . . 
O1 O 0.1431(5) 0.9735(3) 0.3734(3) 0.1196(11) Uani 1 1 d . . . 
C9 C 0.1431(6) 0.8824(3) 0.4119(3) 0.0843(11) Uani 1 1 d . . . 
C8 C 0.3130(5) 0.8536(3) 0.4968(3) 0.0746(9) Uani 1 1 d . . . 
H8 H 0.4567 0.9028 0.5334 0.090 Uiso 1 1 calc R . . 
C3 C 0.6415(7) 0.6062(4) 0.6922(4) 0.1013(12) Uani 1 1 d . . . 
H3A H 0.6497 0.5347 0.6197 0.122 Uiso 1 1 calc R . . 
H3B H 0.5466 0.5673 0.7290 0.122 Uiso 1 1 calc R . . 
C11 C -0.2708(6) 0.7879(4) 0.3059(4) 0.0976(12) Uani 1 1 d . . . 
H11A H -0.3882 0.7506 0.3318 0.117 Uiso 1 1 calc R . . 
H11B H -0.2884 0.8830 0.3174 0.117 Uiso 1 1 calc R . . 
C5 C 0.5345(8) 0.8354(4) 0.7761(4) 0.1221(18) Uani 1 1 d . . . 
H5A H 0.4378 0.8019 0.8153 0.147 Uiso 1 1 calc R . . 
H5B H 0.4712 0.9106 0.7573 0.147 Uiso 1 1 calc R . . 
C2 C 0.8774(7) 0.6578(5) 0.7750(5) 0.1174(15) Uani 1 1 d . . . 
H2A H 0.9378 0.5827 0.7952 0.141 Uiso 1 1 calc R . . 
H2B H 0.9751 0.6878 0.7345 0.141 Uiso 1 1 calc R . . 
C1 C 0.8781(8) 0.7727(4) 0.8846(4) 0.1236(17) Uani 1 1 d . . . 
H1A H 1.0325 0.8071 0.9312 0.148 Uiso 1 1 calc R . . 
H1B H 0.7981 0.7396 0.9308 0.148 Uiso 1 1 calc R . . 
C6 C 0.7690(10) 0.8869(5) 0.8583(5) 0.169(3) Uani 1 1 d . . . 
H6A H 0.8613 0.9287 0.8221 0.203 Uiso 1 1 calc R . . 
H6B H 0.7595 0.9567 0.9314 0.203 Uiso 1 1 calc R . . 
C14 C -0.7079(9) 0.6370(7) 0.1086(6) 0.162(2) Uani 1 1 d . . . 
H14A H -0.6777 0.5438 0.0805 0.243 Uiso 1 1 calc R . . 
H14B H -0.8464 0.6455 0.0592 0.243 Uiso 1 1 calc R . . 
H14C H -0.7208 0.6618 0.1882 0.243 Uiso 1 1 calc R . . 
C12 C -0.2966(9) 0.7107(6) 0.1808(4) 0.1391(19) Uani 1 1 d . . . 
H12A H -0.2869 0.6146 0.1684 0.167 Uiso 1 1 calc R . . 
H12B H -0.1755 0.7451 0.1553 0.167 Uiso 1 1 calc R . . 
C13 C -0.5306(10) 0.7246(7) 0.1056(5) 0.157(2) Uani 1 1 d . . . 
H13A H -0.5599 0.8188 0.1358 0.188 Uiso 1 1 calc R . . 
H13B H -0.5240 0.7029 0.0244 0.188 Uiso 1 1 calc R . . 
H1 H 0.257(7) 0.605(4) 0.588(3) 0.103(12) Uiso 1 1 d . . . 
 
loop_ 
 _atom_site_aniso_label 
 _atom_site_aniso_U_11 
 _atom_site_aniso_U_22 
 _atom_site_aniso_U_33 
 _atom_site_aniso_U_23 
 _atom_site_aniso_U_13 
 _atom_site_aniso_U_12 
N1 0.0665(16) 0.0702(15) 0.0807(18) 0.0394(14) -0.0038(13) -0.0181(12) 
C10 0.0636(18) 0.0710(17) 0.083(2) 0.0313(16) 0.0029(15) -0.0182(14) 
N2 0.0666(16) 0.0837(17) 0.0915(19) 0.0497(15) -0.0098(14) -0.0182(13) 
C7 0.0578(16) 0.0618(15) 0.0662(17) 0.0218(14) 0.0094(13) -0.0117(12) 
O2 0.0765(15) 0.0967(16) 0.133(2) 0.0660(16) -0.0140(14) -0.0361(12) 
C4 0.0647(19) 0.085(2) 0.076(2) 0.0372(18) -0.0065(16) -0.0257(15) 
O1 0.0974(19) 0.1183(19) 0.151(3) 0.094(2) -0.0137(17) -0.0319(15) 
C9 0.076(2) 0.0808(19) 0.095(2) 0.0474(19) 0.0020(18) -0.0211(16) 
C8 0.0661(18) 0.0742(18) 0.080(2) 0.0382(16) 0.0022(15) -0.0172(14) 
C3 0.085(2) 0.092(2) 0.107(3) 0.031(2) -0.004(2) 0.0070(19) 
C11 0.084(2) 0.096(2) 0.106(3) 0.043(2) 0.004(2) -0.0084(19) 
C5 0.129(4) 0.086(2) 0.103(3) 0.013(2) -0.029(3) 0.008(2) 
C2 0.072(2) 0.144(4) 0.136(4) 0.069(3) 0.000(2) 0.007(2) 
C1 0.119(4) 0.118(3) 0.100(3) 0.041(3) -0.033(3) -0.025(3) 
C6 0.176(5) 0.101(3) 0.142(4) 0.017(3) -0.082(4) -0.009(3) 
C14 0.097(4) 0.194(6) 0.185(6) 0.083(5) -0.001(4) 0.005(4) 
C12 0.113(4) 0.179(5) 0.102(3) 0.039(4) 0.005(3) 0.012(3) 
C13 0.115(4) 0.193(5) 0.139(4) 0.081(4) -0.035(3) -0.023(4) 
 
_geom_special_details 
; 
 All esds (except the esd in the dihedral angle between two l.s. planes) 
 are estimated using the full covariance matrix.  The cell esds are taken 
 into account individually in the estimation of esds in distances, angles 
 and torsion angles; correlations between esds in cell parameters are only 
 used when they are defined by crystal symmetry.  An approximate (isotropic) 
 treatment of cell esds is used for estimating esds involving l.s. planes. 
; 
 
loop_ 
 _geom_bond_atom_site_label_1 
 _geom_bond_atom_site_label_2 
 _geom_bond_distance 
 _geom_bond_site_symmetry_2 
 _geom_bond_publ_flag 
N1 C7 1.324(4) . ? 
N1 C4 1.457(4) . ? 
C10 O2 1.212(3) . ? 
C10 N2 1.350(4) . ? 
C10 C7 1.501(4) . ? 
N2 C9 1.420(4) . ? 
N2 C11 1.470(4) . ? 
C7 C8 1.348(4) . ? 
C4 C5 1.493(6) . ? 
C4 C3 1.499(5) . ? 
O1 C9 1.206(4) . ? 
C9 C8 1.434(4) . ? 
C3 C2 1.525(5) . ? 
C11 C12 1.458(6) . ? 
C5 C6 1.516(6) . ? 
C2 C1 1.478(6) . ? 
C1 C6 1.496(6) . ? 
C14 C13 1.403(8) . ? 
C12 C13 1.574(6) . ? 
 
loop_ 
 _geom_angle_atom_site_label_1 
 _geom_angle_atom_site_label_2 
 _geom_angle_atom_site_label_3 
 _geom_angle 
 _geom_angle_site_symmetry_1 
 _geom_angle_site_symmetry_3 
 _geom_angle_publ_flag 
C7 N1 C4 122.2(2) . . ? 
O2 C10 N2 126.6(3) . . ? 
O2 C10 C7 126.6(3) . . ? 
N2 C10 C7 106.8(2) . . ? 
C10 N2 C9 109.4(2) . . ? 
C10 N2 C11 125.3(3) . . ? 
C9 N2 C11 124.3(3) . . ? 
N1 C7 C8 132.2(3) . . ? 
N1 C7 C10 120.1(2) . . ? 
C8 C7 C10 107.7(3) . . ? 
N1 C4 C5 110.8(3) . . ? 
N1 C4 C3 111.6(3) . . ? 
C5 C4 C3 110.3(3) . . ? 
O1 C9 N2 121.6(3) . . ? 
O1 C9 C8 130.8(3) . . ? 
N2 C9 C8 107.5(2) . . ? 
C7 C8 C9 108.5(3) . . ? 
C4 C3 C2 109.8(3) . . ? 
C12 C11 N2 111.4(4) . . ? 
C4 C5 C6 110.9(4) . . ? 
C1 C2 C3 112.4(4) . . ? 
C2 C1 C6 111.3(4) . . ? 
C1 C6 C5 111.3(4) . . ? 
C11 C12 C13 110.4(5) . . ? 
C14 C13 C12 111.9(5) . . ? 
 
_diffrn_measured_fraction_theta_max    0.989 
_diffrn_reflns_theta_full              27.48 
_diffrn_measured_fraction_theta_full   0.989 
_refine_diff_density_max    0.334 
_refine_diff_density_min   -0.197 
_refine_diff_density_rms    0.053 
